# Supplementary material for: Subordinate Effect of -21M HLA-B Dimorphism on NK Cell Repertoire Diversity and Function in HIV-1 Infected Individuals of African Origin
Source: PubMed Central journal article supplement (PMC7041644; doi:10.3389/fimmu.2020.00156), 2020-02-18
Supplement: Table_1.pdf [file Table_1.pdf]

Table S1. Subject characteristics and HLA genotypes

| Subjects | HLA-B -21 | SEX | Age | Country      | Plasma HIV V | HLA-B allele 1 | HLA-B allele 1 | HLA-B allele 2 | HLA-B allele 2 | HLA-C allele 1 | HLA-C allele 1 | HLA-C allele 2 | HLA-C allele 2 | Bw4/Bw6 |
|----------|-----------|-----|-----|--------------|--------------|----------------|----------------|----------------|----------------|----------------|----------------|----------------|----------------|---------|
| 01       | M/M       | F   | 26  | Malawi       | 4.28712962   | *08            | *0801g         | *14            | *1401          | *02            | *0210          | *16            | *1601          | Bw6/Bw6 |
| 2        | M/M       | F   | 21  | Malawi       | 4.27671449   | *42            | *4201          | *42            | *4202          | *17            | *1701          | *17            | *1701          | Bw6/Bw6 |
| 3        | M/M       | F   | 29  | Malawi       | 4.59584881   | *07            | *0702          | *81            | *8101g         | *07            | *0702g         | *18            | *1801g         | Bw6/Bw6 |
| 4        | M/M       | F   | 22  | South Africa | 4.06818586   | *14            | *1402          | *42            | *4202          | *08            | *0802          | *17            | *1701          | Bw6/Bw6 |
| 5        | M/M       | F   | 31  | South Africa | 2.65030752   | *81            | *8101g         | *07            | *0702g         | *07            | *0702g         | *18            | *1801g         | Bw6/Bw6 |
| 6        | M/M       | F   | 43  | Tanzania     | 3.86628734   | *14            | *1401          | *42            | *420101        | *08            | *080201        | *17            | *1701/02/03    | Bw6/Bw6 |
| 7        | M/M       | F   | 50  | Tanzania     | 4.27902781   | *07            | *0702/44/49    | *42            | *420101        | *07            | *0702/50/66    | *17            | *1701/02/03    | Bw4/Bw6 |
| 8        | M/M       | F   | 32  | Tanzania     | 5.31964105   | *42            | *42:02         | *48            | *48:05         | *17            | *17:01         | *15            | *15:05/09/2    | Bw6/Bw6 |
| 9        | M/M       | F   | 22  | South Africa | 4.45334892   | *07            | *0702g         | *14            | *1402          | *07            | *0702g         | *08            | *0802          | Bw6/Bw6 |
| 10       | M/M       | F   | 23  | South Africa | 2.60205999   | *81            | *8101/02       | *07            | *0703/16/37    | *18            | *1801/02       | *04            | *0407/*1801    | Bw6/Bw6 |
| 11       | M/M       | F   | 21  | Malawi       | 4.37235958   | *07            | *0703          | *67            | *6701          | *07            | *0702g         | *12            | *1203          | Bw6/Bw6 |
| 12       | T/T       | F   | 22  | Malawi       | 4.70854837   | *15            | *1503g         | *35            | *3501/28       | *02            | *0210          | *04            | *0401g         | Bw6/Bw6 |
| 13       | T/T       | F   | 31  | Malawi       | 4.23739292   | *41            | *4101          | *45            | *4501g         | *06            | *0602          | *17            | *1701          | Bw6/Bw6 |
| 14       | T/T       | F   | 19  | South Africa | 5.2380461    | *15            | *1503g         | *45            | *4501g         | *02            | *0210          | *06            | *0602          | Bw6/Bw6 |
| 15       | T/T       | F   | 22  | South Africa | 4.45939249   | *18            | *1801g         | *35            | *3501g         | *04            | *04:01/09N/    | *07            | *07:04/11      | Bw6/Bw6 |
| 16       | T/T       | F   | 39  | South Africa | 3.69635639   | *15            | *1510          | *15            | *1510          | *03            | *0304          | *04            | *0401g         | Bw6/Bw6 |
| 17       | T/T       | F   | 22  | South Africa | 3.82197182   | *15            | *151001        | *18            | *1801/17N      | *07            | *0704/11       | *08            | *0804          | Bw6/Bw6 |
| 18       | T/T       | F   | 35  | Tanzania     | 3.78561452   | *15            | *1503/103      | *45            | *4501/07       | *07            | *0701/06/18    | *16            | *160101        | Bw6/Bw6 |
| 19       | T/T       | F   | 20  | Malawi       | 4.24519176   | *45            | *4501/07       | *57            | *570301        | *16            | *160101        | *18            | *1801/02       | Bw4/Bw6 |
| 20       | T/T       | F   | 35  | Malawi       | 4.4798775    | *44            | *4403          | *45            | *4501g         | *14            | *1403          | *16            | *1601          | Bw4/Bw6 |
| 21       | T/T       | F   | 29  | Tanzania     | 5.45947693   | *18            | *18:01/53/5    | *53            | *53:01         | *04            | *04:01/09N/    | *07            | *07:04/11      | Bw4/Bw6 |
| 22       | T/T       | F   | 23  | Malawi       | 4.46097297   | *18            | *18:01/53/5    | *53            | *53:01         | *04            | *04:01/09N/    | *07            | *07:04/11      | Bw4/Bw6 |
| 23       | T/T       | F   | 28  | Malawi       | 4.67858211   | *15            | *15:03/61/1    | *41            | *41:02/11      | *17            | *17:01         | *02            | *02:10         | Bw6/Bw6 |
| 24       | T/T       | F   | 27  | South Africa | 2.60205999   | *41            | *4102/04       | *15            | *1503/61/74    | *02            | *0202/04/07    | *02            | *0203/16/*1    | Bw6/Bw6 |
| 25       | M/T       | F   | 34  | Malawi       | 4.25558605   | *15            | *1503g         | *42            | *4201          | *02            | *0210          | *17            | *1701          | Bw6/Bw6 |
| 26       | M/T       | F   | 22  | Malawi       | 4.64674671   | *08            | *0801g         | *15            | *1510          | *03            | *0304          | *07            | *0701g         | Bw6/Bw6 |
| 27       | M/T       | F   | 31  | Malawi       | 6.01989483   | *14            | *1402          | *18            | *1801g         | *07            | *0704/12       | *08            | *0802          | Bw6/Bw6 |
| 28       | M/T       | F   | 24  | Malawi       | 5.1033384    | *07            | *07:02/44/4    | *18            | *18:01/53/5    | *07            | *07:04/11/1    | *07            | *07:02/50/6    | Bw6/Bw6 |
| 29       | M/T       | F   | 30  | South Africa | 4.30749604   | *15            | *1510          | *39            | *3910          | *08            | *0804          | *12            | *1203          | Bw6/Bw6 |
| 30       | M/T       | F   | 22  | South Africa | 3.94101424   | *08            | *0801g         | *15            | *1510          | *04            | *0401g         | *07            | *0701g         | Bw6/Bw6 |
| 31       | M/T       | F   | 21  | South Africa | 3.73965144   | *15            | *151001        | *08            | *0801/08N/     | *07            | *0701/06/18    | *08            | *0804          | Bw6/Bw6 |
| 32       | M/T       | F   | 38  | South Africa | 3.15594302   | *08            | *0801g         | *15            | *1510          | *03            | *0304          | *03            | *0304          | Bw6/Bw6 |
| 33       | M/T       | F   | 53  | Tanzania     | 3.59117595   | *15            | *1503/103      | *39            | *3924          | *02            | *0210          | *07            | *0701/06/18    | Bw6/Bw6 |
| 34       | M/T       | F   | 27  | Malawi       | 5.17000047   | *15            | *1503g         | *42            | *4201          | *02            | *0210          | *17            | *1701          | Bw6/Bw6 |
| 35       | M/T       | F   | 26  | Malawi       | 4.85868755   | *15            | *151001        | *42            | *4202          | *03            | *030402        | *17            | *1701/02/03    | Bw6/Bw6 |
| 36       | M/T       | F   | 26  | Malawi       | 4.98582152   | *14            | *14:02/20/2    | *15            | *15:10         | *04            | *04:01/09N/    | *16            | *16:01/32/3    | Bw6/Bw6 |
