# Supplementary material for: Subordinate Effect of -21M HLA-B Dimorphism on NK Cell Repertoire Diversity and Function in HIV-1 Infected Individuals of African Origin
Source: PubMed Central journal article supplement (PMC7041644; doi:10.3389/fimmu.2020.00156), 2020-02-18
Supplement: Table_2.pdf [file Table_2.pdf]

**Table S2. Antibody List**

| Antibodies                                                       | Clone             | Titration                                 | Cat number         | Company         |
|------------------------------------------------------------------|-------------------|-------------------------------------------|--------------------|-----------------|
| Brilliant Violet 510 anti-human CD14                             | <b>M5E2</b>       | 1 in 100                                  | <b>301842</b>      | BioLegend       |
| Brilliant Violet 510 anti-human CD19                             | <b>HIB19</b>      | 1 in 100                                  | <b>302242</b>      | BioLegend       |
| PE/Dazzle 594 anti-human CD56 (NCAM)                             | <b>HCD56</b>      | 2 in 100                                  | <b>318348</b>      | BioLegend       |
| Brilliant Violet 605 anti-human CD56 (NCAM)                      | <b>HCD56</b>      | 2 in 100                                  | <b>318334</b>      | BioLegend       |
| Brilliant Violet 650 anti-human CD3                              | <b>OKT3</b>       | 1 in 100                                  | <b>317324</b>      | BioLegend       |
| PerCP anti-human CD16                                            | <b>3G8</b>        | 1 in 100                                  | <b>302030</b>      | BioLegend       |
| Brilliant Violet 711 anti-human CD16                             | <b>3G8</b>        | 1 in 100                                  | <b>302044</b>      | BioLegend       |
| PE anti-human HLA-E                                              | <b>3D12</b>       | 1 in 100                                  | <b>342604</b>      | BioLegend       |
| CD4 monoclonal antibody, APC-eFluor 780                          | <b>RPA-T4</b>     | 1 in 200                                  | <b>47-0049-42</b>  | eBiosciences    |
| CD8a monoclonal antibody, Alexa Fluor 700                        | <b>OKT8</b>       | 1 in 200                                  | <b>56-0086-42</b>  | eBiosciences    |
| PE anti-human CD328 (Siglec-7)                                   | <b>6-434</b>      | 1 in 100                                  | <b>339204</b>      | Biolegend       |
| PE mouse anti-human HLA-C                                        | <b>DT-9</b>       | 1 in 200                                  | <b>566372</b>      | BD Biosciences  |
| PeCy7 CD159a (NKG2a)                                             | <b>Z199</b>       | 1 in 100                                  | <b>B10246</b>      | Beckman Coulter |
| APC KIR2DL2/2DL3/2DS2 (CD158b1/b2,j)                             | <b>GL183</b>      | 2 in 100                                  | <b>A22333</b>      | Beckman Coulter |
| PE anti-human NKG2C/CD159c                                       | <b>134591</b>     | 4 in 100                                  | <b>FAB138P</b>     | R&D systems     |
| Alexa Fluor® 700 anti-human NKG2C/CD159c                         | <b>134591</b>     | 5 in 100                                  | <b>FAB138N</b>     | R&D systems     |
| APC anti-human KIR2DL1/KIR2DS5                                   | <b>143211</b>     | 4 in 100                                  | <b>FAB1844A</b>    | R&D systems     |
| APC anti-human KIR3DL2/CD158k                                    | <b>539304</b>     | 2 in 100                                  | <b>FAB2878A</b>    | R&D systems     |
| Brilliant Violet 421 mouse anti-human CD57                       | <b>NK-1</b>       | 1 in 200                                  | <b>563896</b>      | BD Biosciences  |
| FITC mouse anti-human CD57                                       | <b>NK-1</b>       | 2 in 100                                  | <b>555619</b>      | BD Biosciences  |
| APC mouse anti-human CD158e (KIR3DL1)                            | <b>DX9</b>        | 2 in 100                                  | <b>130-092-474</b> | Miltenyi Biotec |
| Brilliant Violet 421 mouse anti-human IFN- $\gamma$              | <b>B27</b>        | 1 in 100                                  | <b>562988</b>      | BD Biosciences  |
| Milli-Mark anti-Fc $\epsilon$ RI antibody, $\gamma$ subunit-FITC | <b>Polyclonal</b> | Dilute primary Ab 1 in 5 in PBS; 3 in 100 | <b>FCABS400F</b>   | MerckMillipore  |
| PE-CF594 mouse anti-human PLZF                                   | <b>R17-809</b>    | 1 in 200                                  | <b>565738</b>      | BD Biosciences  |
| APC-H7 mouse anti-human CD107a                                   | <b>H4A3</b>       | 2 in culture                              | <b>561343</b>      | BD Biosciences  |
